# Supplementary material
Source: publisher figshare collection journal article supplement (https://acs.figshare.com/ndownloader/files/4639282)
Supplement: Supplementary file 1 [file 4639282]

# Preparation of quadrate crystalline Cu(TCNQ) microtubes and assembly of a novel co-patterned structure

Xin-Hong Zhou, Shu-Jie Wei, Shu-Sheng Zhang\*

*Key Laboratory of Eco-chemical Engineering of Ministry of Education, College of Chemistry and Molecular Engineering, Qingdao University of Science and Technology, Qingdao 266042, P. R. China*

(Received <Month> <Date>, <Year>; CL-<No>)

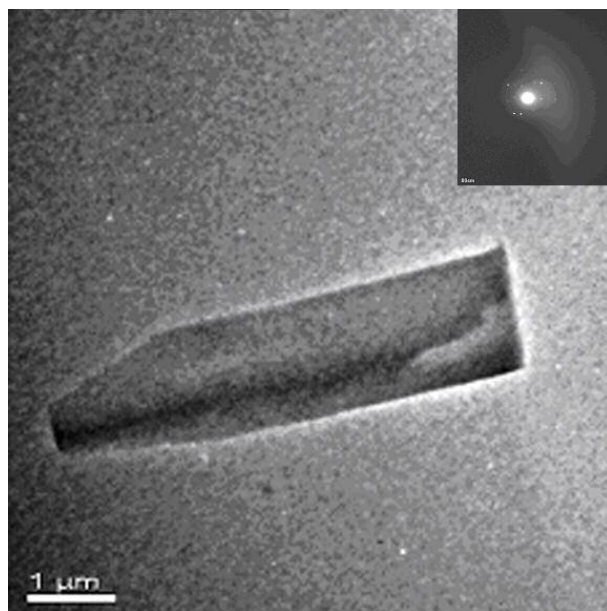

S-Figure 2. The typical TEM image and its SAED pattern of Cu(TCNQ) microtube arrays

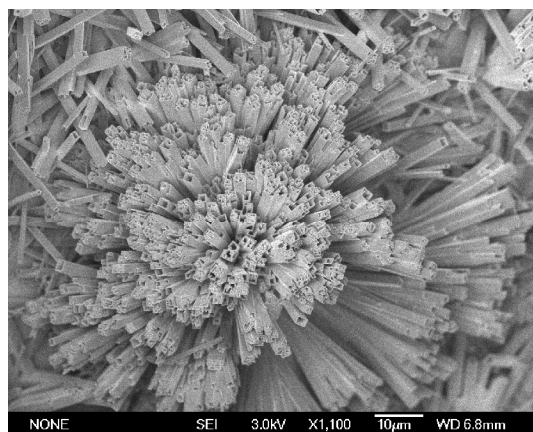

S-Figure 2. The typical SEM image of dendrite Cu(TCNQ) microtube arrays

Topography control of microtubes has been achieved by tuning the reaction condition. Dendrite quadrate microtube arrays can be obtained from the copper islands by controlling a long electro-deposition time at the same condition.
